# Supplementary material for: A Phylogenomic Approach to Vertebrate Phylogeny Supports a Turtle-Archosaur Affinity and a Possible Paraphyletic Lissamphibia
Source: PubMed Central journal article supplement (PMC3492174; doi:10.1371/journal.pone.0048990), 2012-11-07

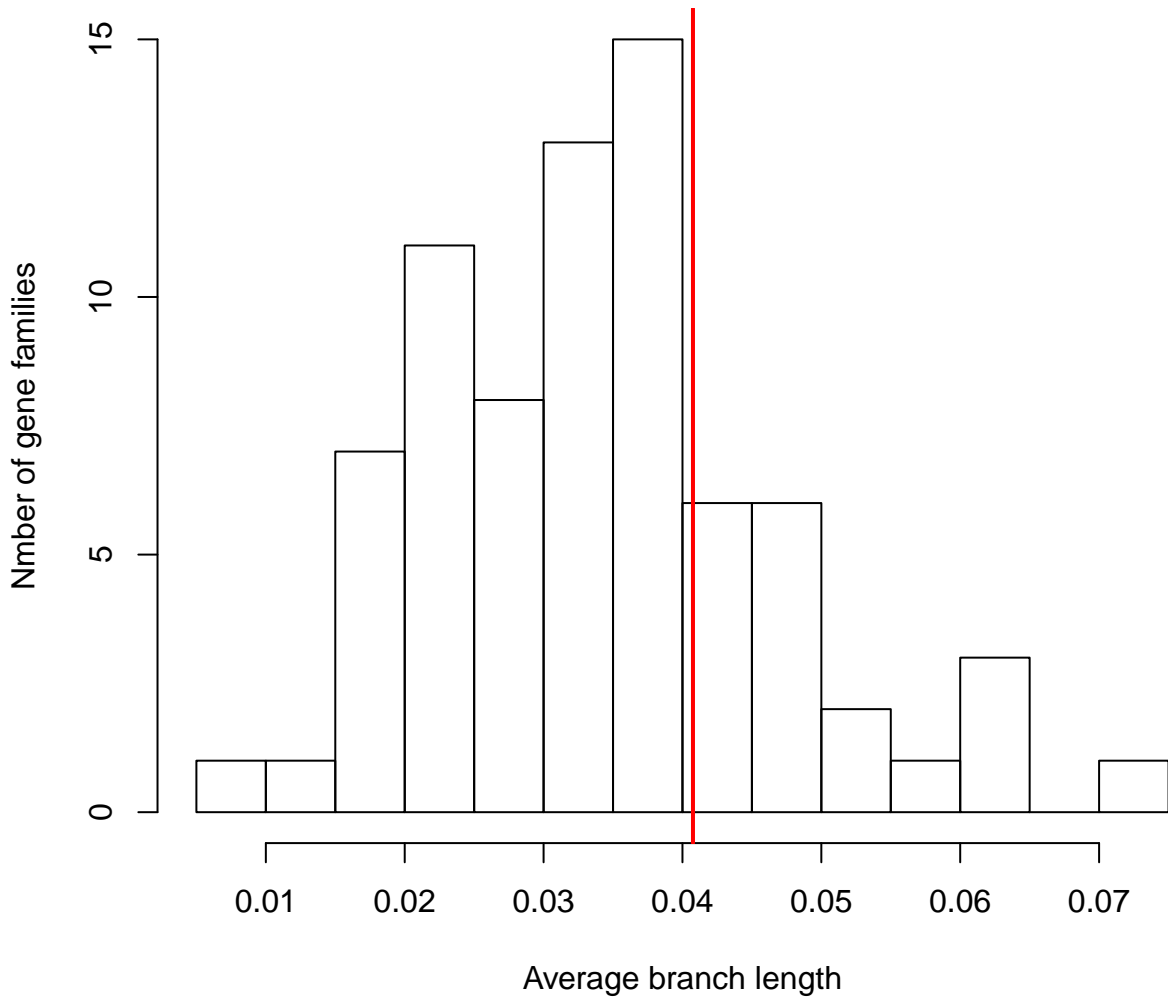

Supplement: pone.0048990.s002.pdf [file pone.0048990.s002.pdf]
